# Supplementary material
Source: publisher figshare collection journal article supplement (https://acs.figshare.com/ndownloader/files/4105288)
Supplement: Supplementary file 1 [file 4105288]

## **Supporting Information**

### **Reactive Probes for Ratiometric Detection of $\text{Co}^{2+}$ and $\text{Cu}^{+}$ Based on ESIPT Mechanism**

**Debabrata Maity, Vikash Kumar and T. Govindaraju\***

New Chemistry Unit, Jawaharlal Nehru Centre for Advanced Scientific Research (JNCASR), Jakkur  
P.O., Bangalore-560064, India. Fax: +91 80 22082627; Tel: +91 80 22082969.

E-mail: tgraju@jncasr.ac.in.

## **Contents**

|                                                             |                   |
|-------------------------------------------------------------|-------------------|
| General experimental procedure                              | <b>page 2</b>     |
| Synthetic details                                           | <b>page 2-3</b>   |
| General method for measurements of photophysical properties | <b>page 4</b>     |
| Fluorescence study, pH study, mass spectra,                 | <b>page 5-12</b>  |
| Proposed mechanism of oxidative benzylic ether cleavage     | <b>page 13-14</b> |
| Competitive experiment                                      | <b>page 15</b>    |
| NMR and HRMS spectra                                        | <b>page 16-20</b> |
| References                                                  | <b>page 21</b>    |

## General experimental procedure

All the solvents and reagents were obtained from Sigma-Aldrich and used as received unless otherwise mentioned. The solutions of metal ions were prepared from  $\text{Al}(\text{ClO}_4)_3 \cdot 9\text{H}_2\text{O}$ ,  $\text{LiClO}_4 \cdot 3\text{H}_2\text{O}$ ,  $\text{NaClO}_4$ ,  $\text{Mg}(\text{ClO}_4)_2$ ,  $\text{Ca}(\text{ClO}_4)_2 \cdot 4\text{H}_2\text{O}$ ,  $\text{Sr}(\text{NO}_3)_2$ ,  $\text{Ba}(\text{ClO}_4)_2$ ,  $\text{Mn}(\text{ClO}_4)_2 \cdot 6\text{H}_2\text{O}$ ,  $\text{Fe}(\text{ClO}_4)_2 \cdot \text{H}_2\text{O}$ ,  $\text{Co}(\text{ClO}_4)_2 \cdot 6\text{H}_2\text{O}$ ,  $\text{Cd}(\text{ClO}_4)_2 \cdot \text{H}_2\text{O}$ ,  $\text{Ag}(\text{ClO}_4)_2$ ,  $\text{Hg}(\text{ClO}_4)_2$ ,  $\text{Pb}(\text{ClO}_4)_2$ ,  $\text{Ni}(\text{ClO}_4)_2 \cdot 6\text{H}_2\text{O}$ ,  $\text{Cu}(\text{ClO}_4)_2 \cdot 6\text{H}_2\text{O}$ ,  $[\text{Cu}(\text{CH}_3\text{CN})_4]\text{PF}_6$  and  $\text{Zn}(\text{ClO}_4)_2 \cdot 6\text{H}_2\text{O}$  respectively in  $\text{CH}_3\text{CN}$ .  $^1\text{H}$  and  $^{13}\text{C}$  NMR were recorded on a Bruker AV-400 spectrometer with chemical shifts reported as ppm (in  $\text{CDCl}_3$ , tetramethylsilane as internal standard). HRMS were recorded on Agilent 6538 UHD Accurate-Mass Q-TOF LC/MS analyzer. Fluorescence spectra were recorded on a Perkin Elmer LS 55 spectrophotometer.

## Synthesis of HBTCu and HBTCu

**Synthesis of HBTCu.** A mixture of 2-hydroxybenzothiazole (65 mg, 0.28 mmol) and  $\text{N}_3\text{O}$  ligand<sup>1</sup> (100 mg, 0.34 mmol) was dissolved in DMF (10 mL).  $\text{K}_2\text{CO}_3$  (400 mg, 2.8 mmol) was added and the resulting mixture was heated at 90 °C for overnight. After cooling to room temperature, solvent was evaporated in vacuo. The residue in  $\text{H}_2\text{O}$  (50 mL) was extracted with of  $\text{CH}_2\text{Cl}_2$  (3×20 mL). This organic layer was washed with brine, dried over  $\text{Na}_2\text{SO}_4$ , solvent was evaporated in vacuo and the residue was purified on basic alumina column (solvent.  $\text{CH}_2\text{Cl}_2/\text{MeOH}$ : 95/5) to obtain the product as light yellow oil (121 mg, yield 88%).  $^1\text{H}$  NMR (400 MHz,  $\text{CDCl}_3$ )  $\delta$  2.90 (2H, t,  $J = 5.2$  Hz), 3.69 (2H, t,  $J = 5.2$  Hz), 3.96 (4H, d,  $J = 4$  Hz), 5.47 (2H, s), 7.11-7.16 (3H, m), 7.27-7.31 (2H, m), 7.34-7.43 (2H, m), 7.47-7.51 (2H, m), 7.54-7.58 (1H, td,  $J = 6$  Hz, 1.6 Hz), 7.63 (1H, t,  $J = 7.6$  Hz), 7.88 (1H, d,  $J = 8$  Hz), 8.09 (1H, d,  $J = 8$  Hz), 8.51-8.55 (2H, m) (Note: HBTCu contains one exchangeable alcoholic proton. Therefore the signal for this proton not appeared in the spectrum).  $^{13}\text{C}$  NMR (400 MHz,  $\text{CDCl}_3$ )  $\delta$  56.8, 59.7, 60.0, 60.1, 71.4, 113.1, 120.2, 121.2, 121.6, 122.1, 122.2, 122.7, 122.8, 123.0, 124.6, 125.9,

129.9, 131.8, 136.0, 136.5, 137.4, 149.0, 152.2, 155.8, 155.9, 159.1, 159.2, 163.0. HRMS: observed  $m/z = 505.1667$   $[M + Na]^+$  and calculated  $m/z = 505.1674$  for  $C_{28}H_{26}N_4NaO_2S$ .

**Synthesis of HBTcCu.** A mixture of 2-hydroxybenzothiazole (80 mg, 0.35 mmol) and **N<sub>4</sub>** ligand<sup>2</sup> (143 mg, 0.42 mmol) was dissolved in DMF (10 mL).  $K_2CO_3$  (490 mg, 3.5 mmol) was added and the resulting mixture was heated at 90 °C for overnight. After cooling to room temperature, the solvent was evaporated in vacuo. The residue in  $H_2O$  (50 mL) was extracted with of  $CH_2Cl_2$  (3×20 mL). This organic layer was washed with brine, dried over  $Na_2SO_4$ , evaporated in vacuo and the residue was purified on neutral alumina column (solvent. ethyl acetate) to obtain the product as light yellow oil (168 mg, yield 90%).  $^1H$  NMR (400 MHz,  $CDCl_3$ )  $\delta$  3.92 (4H, s), 3.93 (2H, s), 5.46 (2H, s), 7.08-7.16 (4H, m), 7.33-7.39 (2H, m), 7.46-7.49 (2H, m), 7.50-7.70 (6H, m), 7.86 (1H, d,  $J = 7.6$  Hz), 8.08 (1H, d,  $J = 8$  Hz), 8.50 (1H, dd,  $J = 6.4$  Hz, 1.6 Hz), 8.53 (2H, d,  $J = 4.4$  Hz).  $^{13}C$  NMR (400 MHz,  $CDCl_3$ )  $\delta$  59.0, 59.2, 70.6, 76.1, 112.0, 119.0, 120.2, 120.5, 121.0, 121.1, 121.6, 121.8, 121.9, 123.6, 124.9, 128.8, 130.7, 135.0, 135.4, 136.3, 148.1, 151.2, 154.7, 154.9, 158.1, 158.3, 162.0. HRMS: observed  $m/z = 530.2014$   $[M + H]^+$  and calculated  $m/z = 530.2015$  for  $C_{32}H_{28}N_5OS$ .

## General method for measurements of photophysical properties

Fluorescence spectra were recorded on a Perkin Elmer model LS 55 spectrophotometer. 1 cm cells were used for emission titration. For fluorescence titrations stock solution of ligands **HBTC<sub>Co</sub>** and **HBTC<sub>Cu</sub>** were prepared ( $c = 2000 \mu\text{M}$ ) in  $\text{CH}_3\text{CN}$ . The solutions of guest cations were prepared in  $\text{CH}_3\text{CN}$  in the order of  $10^{-3} \text{ M}$ . Working solutions of **HBTC<sub>Co</sub>** and **HBTC<sub>Cu</sub>** and metal ions were prepared from the stock solutions. Excitation was carried out at 350 nm for **HBTC<sub>Co</sub>** and **HBTC<sub>Cu</sub>** with 10 nm excitation and 10 nm emission slit widths.

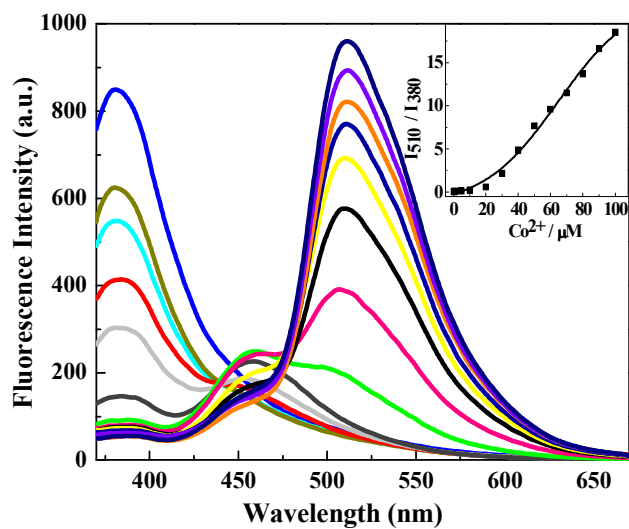

**Figure S1.** Fluorescence responses of **HBTCO** (20.0  $\mu\text{M}$ ) upon addition of 0.0, 5.0, 10.0, 20.0, 30.0, 40.0, 50.0, 60.0, 70.0, 80.0, 90.0, 100.0  $\mu\text{M}$  of  $\text{Co}^{2+}$  after 2 h in aqueous solution (50 mM HEPES, pH 7.2, 2 mM GSH) ( $\lambda_{\text{ex}} = 350 \text{ nm}$ ).

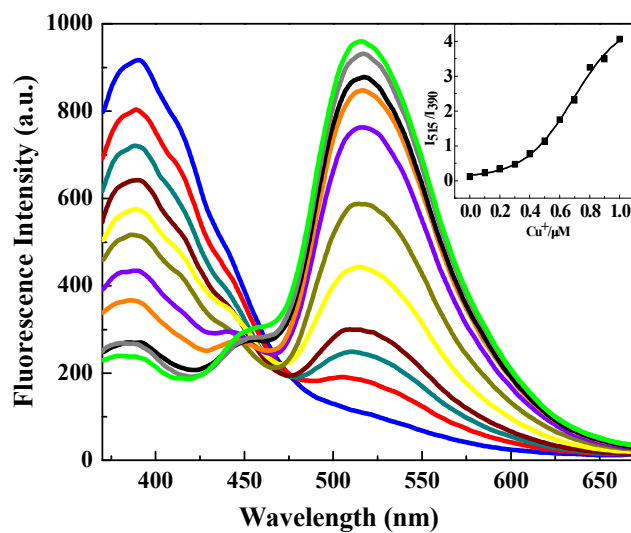

**Figure S2.** Fluorescence responses of **HBTcCu** (20.0  $\mu\text{M}$ ) upon addition of 0.0, 0.1, 0.2, 0.3, 0.4, 0.5, 0.6, 0.7, 0.8, 0.9, 1.0  $\mu\text{M}$  of  $\text{Cu}^{2+}$  after 2 h in aqueous solution (50 mM HEPES, pH 7.2, 2 mM GSH) ( $\lambda_{\text{ex}} = 350 \text{ nm}$ ).

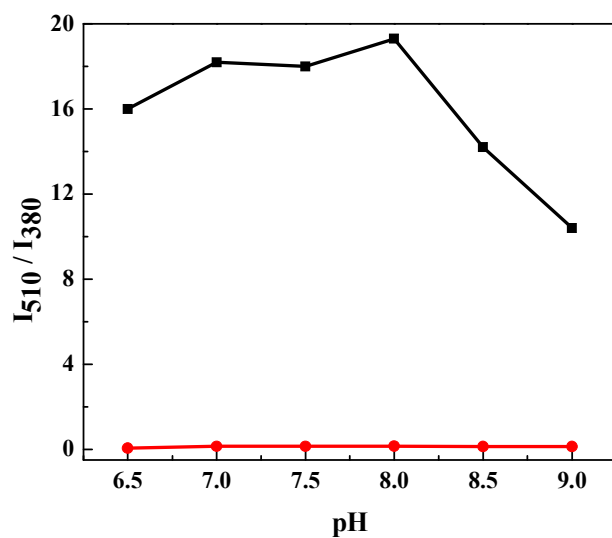

**Figure S3.** Effect of pH on the ratiometric fluorescence emission of **HBTCo**. **HBTCo** (20.0  $\mu\text{M}$ ) with 100.0  $\mu\text{M}$  of  $\text{Co}^{2+}$  after 2 h in aqueous solution (50 mM HEPES, pH 7.2). Black trace: with 2 mM GSH and red trace: without GSH in the buffer.

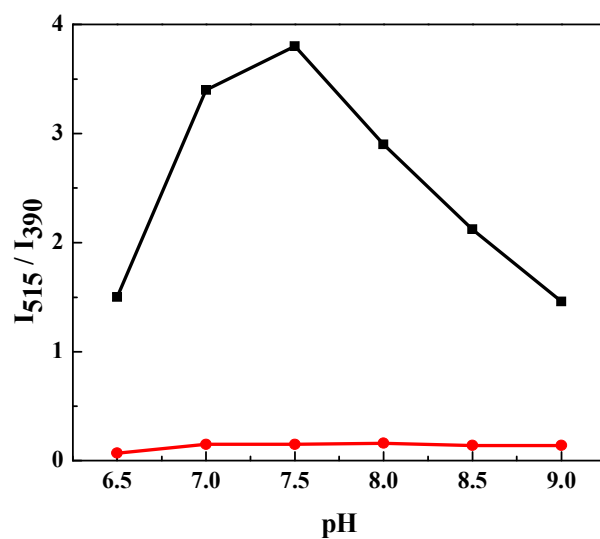

**Figure S4.** Effect of pH on the ratiometric emission of **HBTCu**. **HBTCu** (20.0  $\mu\text{M}$ ) with 1.0  $\mu\text{M}$  of  $\text{Cu}^+$  after 2 h in aqueous solution (50 mM HEPES, pH 7.2). Black trace: with 2 mM GSH and red trace: without GSH in the buffer.

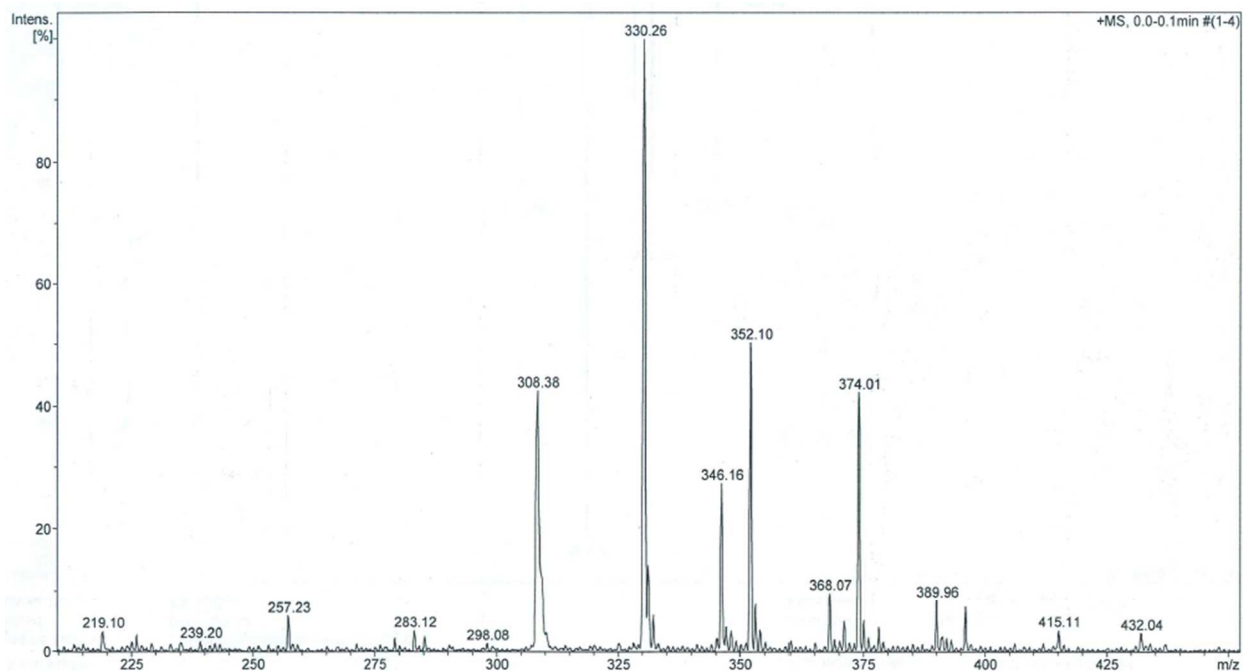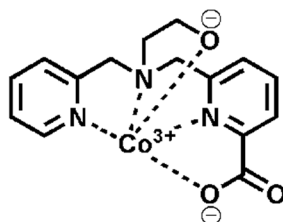

Calculated  $m/z = 344.04$  for  $C_{15}H_{16}CoN_3O_3$  ( $N_3O$ -Co complex)

**Figure S5.** ESI mass spectra (positive ion mode) for the reaction of 20.0  $\mu M$  **HBTCo** with 100.0  $\mu M$   $Co^{2+}$  in water in presence of 100.0  $\mu M$  GSH. Mass peaks observed at 346.16 ( $[M + 2H]^+$ ), 368.07 ( $[M + H + Na]^+$ ) and 389.96 ( $[M + 2Na]^+$ ) are corresponds to  $N_3O$ -Co complex  $C_{15}H_{16}CoN_3O_3$ . Mass peaks observed at 308.38 ( $[M + H]^+$ ), 330.26 ( $[M + Na]^+$ ), 352.10 ( $[M + 2Na - H]^+$ ) and 374.01 ( $[M + 3Na - 2H]^+$ ) are corresponds to GSH.

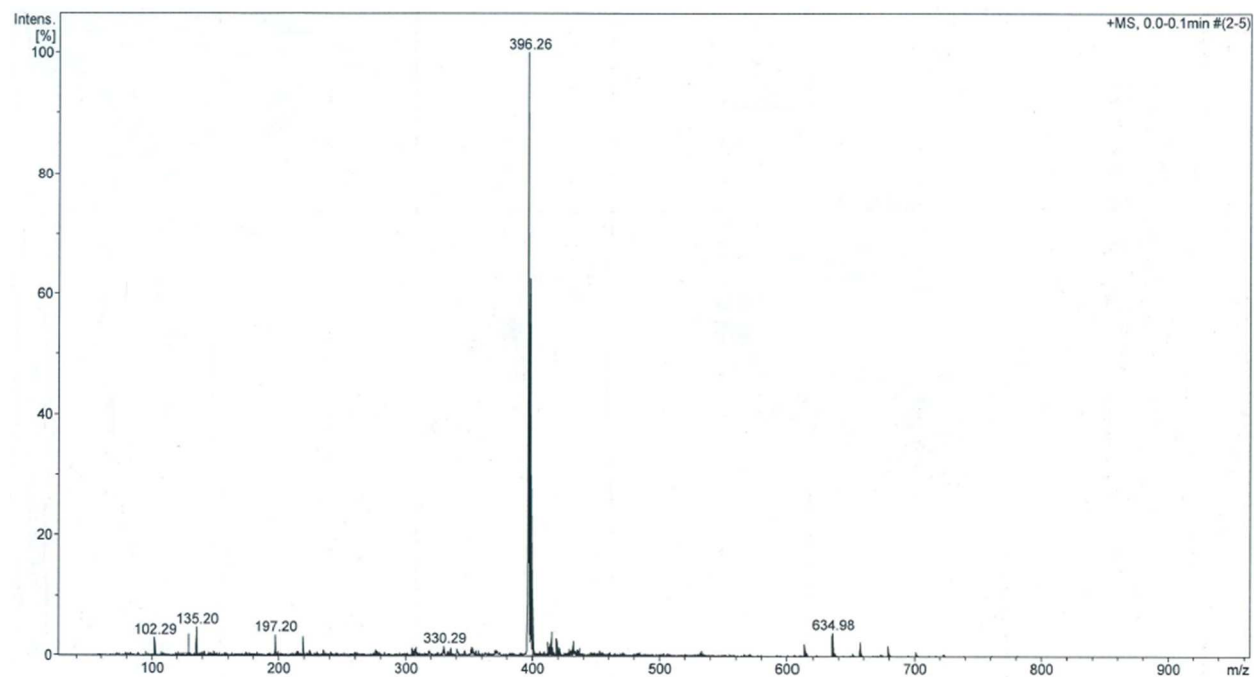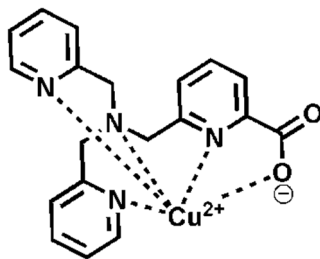

Calculated  $m/z = 396.06$  for  $C_{19}H_{17}CuN_4O_2$  ( $N_4$ -Cu complex)

**Figure S6.** ESI mass spectra (positive ion mode) for the reaction of  $20.0\ \mu\text{M}$  **HBTCu** with  $10.0\ \mu\text{M}$   $\text{Cu}^+$  in water in presence of  $100.0\ \mu\text{M}$  GSH. Mass peaks observed at  $396.26$  ( $[\text{M} + \text{H}]^+$ ) corresponds to  $N_4$ -Cu complex  $C_{19}H_{17}CuN_4O_2$ . Mass peaks observed at  $330.29$  ( $[\text{M} + \text{Na}]^+$ ) is corresponds to GSH.

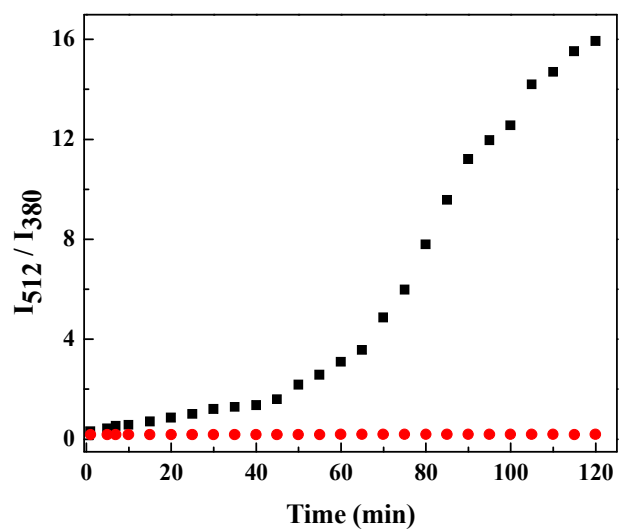

**Figure S7.** Time dependent ratiometric study of 20.0  $\mu\text{M}$  **HBTCO** incubated with 100  $\mu\text{M}$  of  $\text{Co}^{2+}$  in aqueous solution (50 mM HEPES, pH 7.2) with (**black trace**) and without (**red trace**) 2 mM GSH.

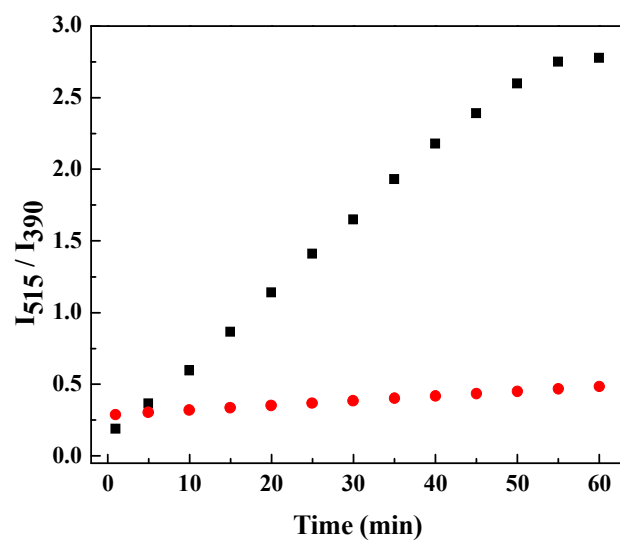

**Figure S8.** Time dependent ratiometric study of 20.0  $\mu\text{M}$  **HBTCu** incubated with 1.0  $\mu\text{M}$  of  $\text{Cu}^+$  in aqueous solution (50 mM HEPES, pH 7.2) with (**black trace**) and without (**red trace**) 2 mM GSH.

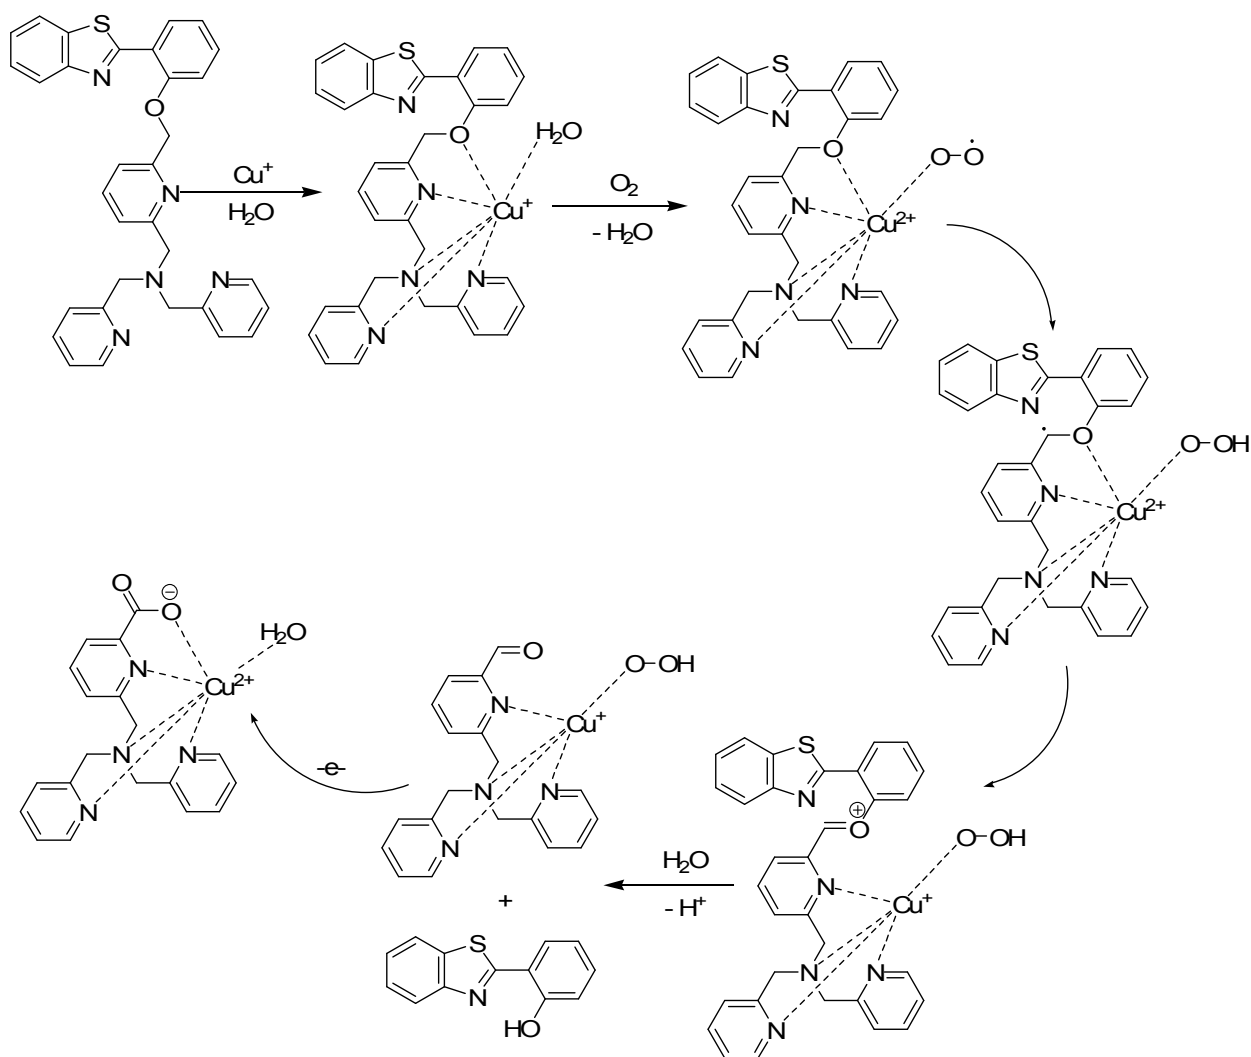

**Figure S9.** Proposed mechanism for oxidative cleavage of benzylic ether bond in **HBTcCu**

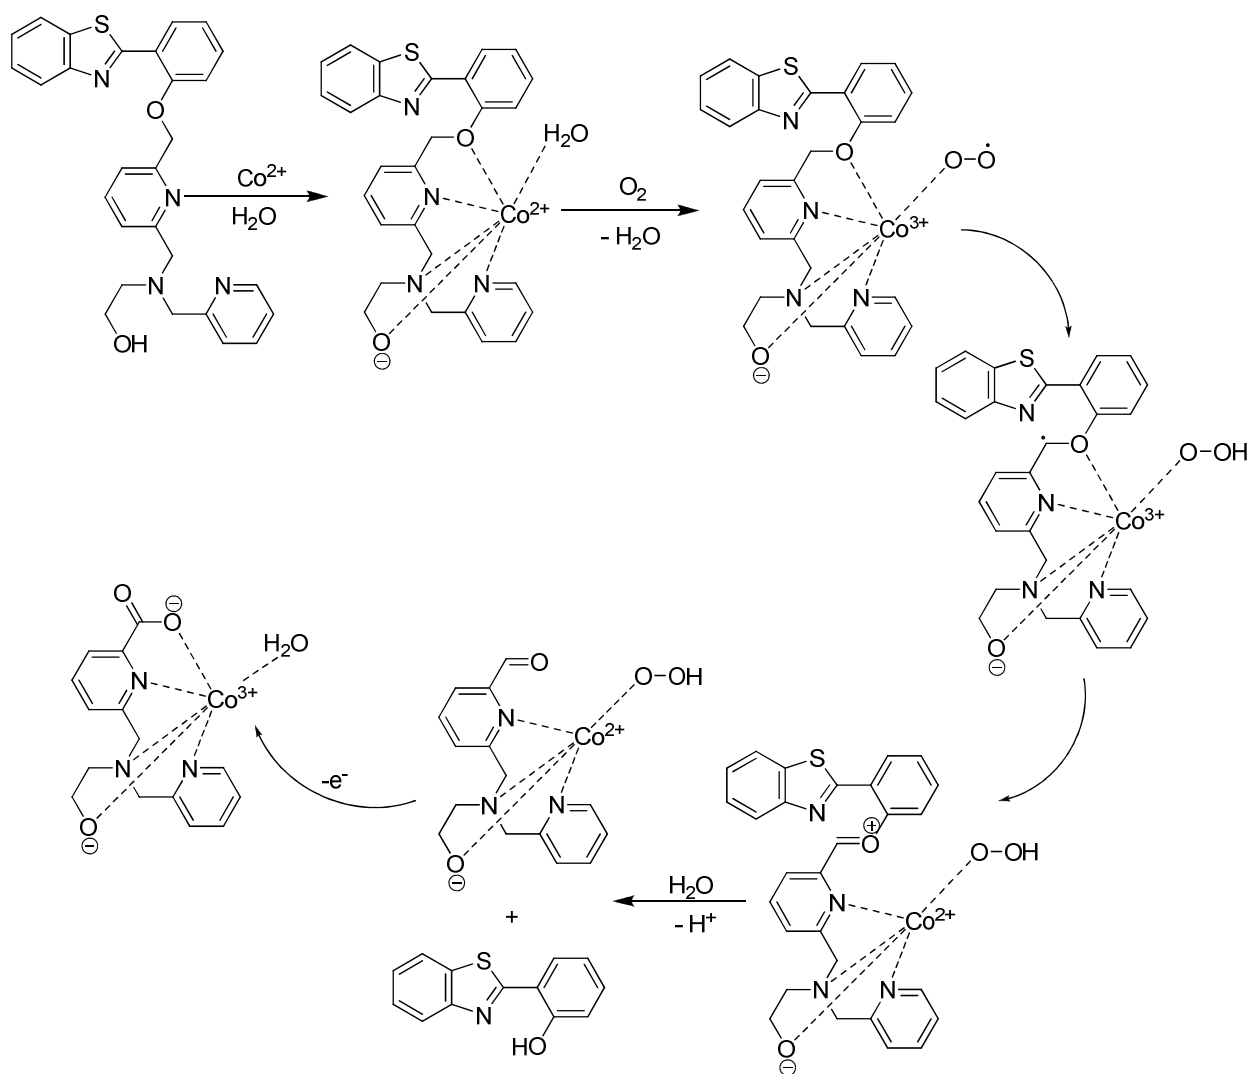

**Figure S10.** Proposed mechanism for oxidative cleavage of benzylic ether bond in **HBTCo**

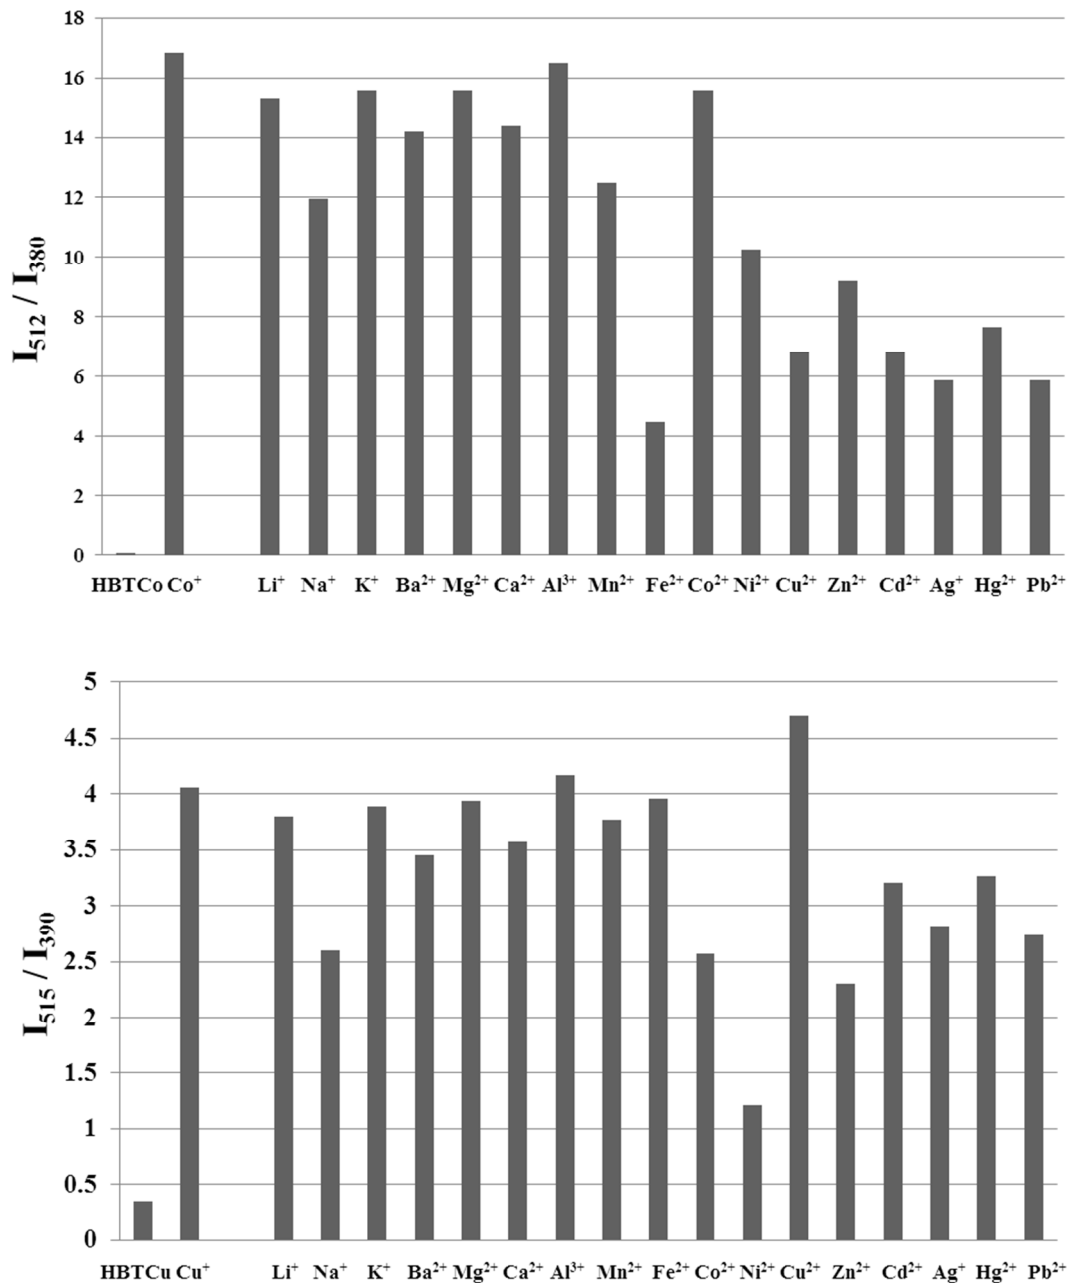

**Figure S11.** Competitive experiment for the detection of Co<sup>2+</sup> and Cu<sup>+</sup> using 20.0  $\mu$ M HBTCO and HBTCu respectively. Top: 100.0  $\mu$ M Co<sup>2+</sup> is mixed with 100.0  $\mu$ M of corresponding metal ions. Bottom: 100.0  $\mu$ M Cu<sup>+</sup> is mixed with 100.0  $\mu$ M of corresponding metal ions. Left two bars are control response of the corresponding probe and only metal ion.

# NMR spectra

## <sup>1</sup>H NMR spectrum of HBTCO

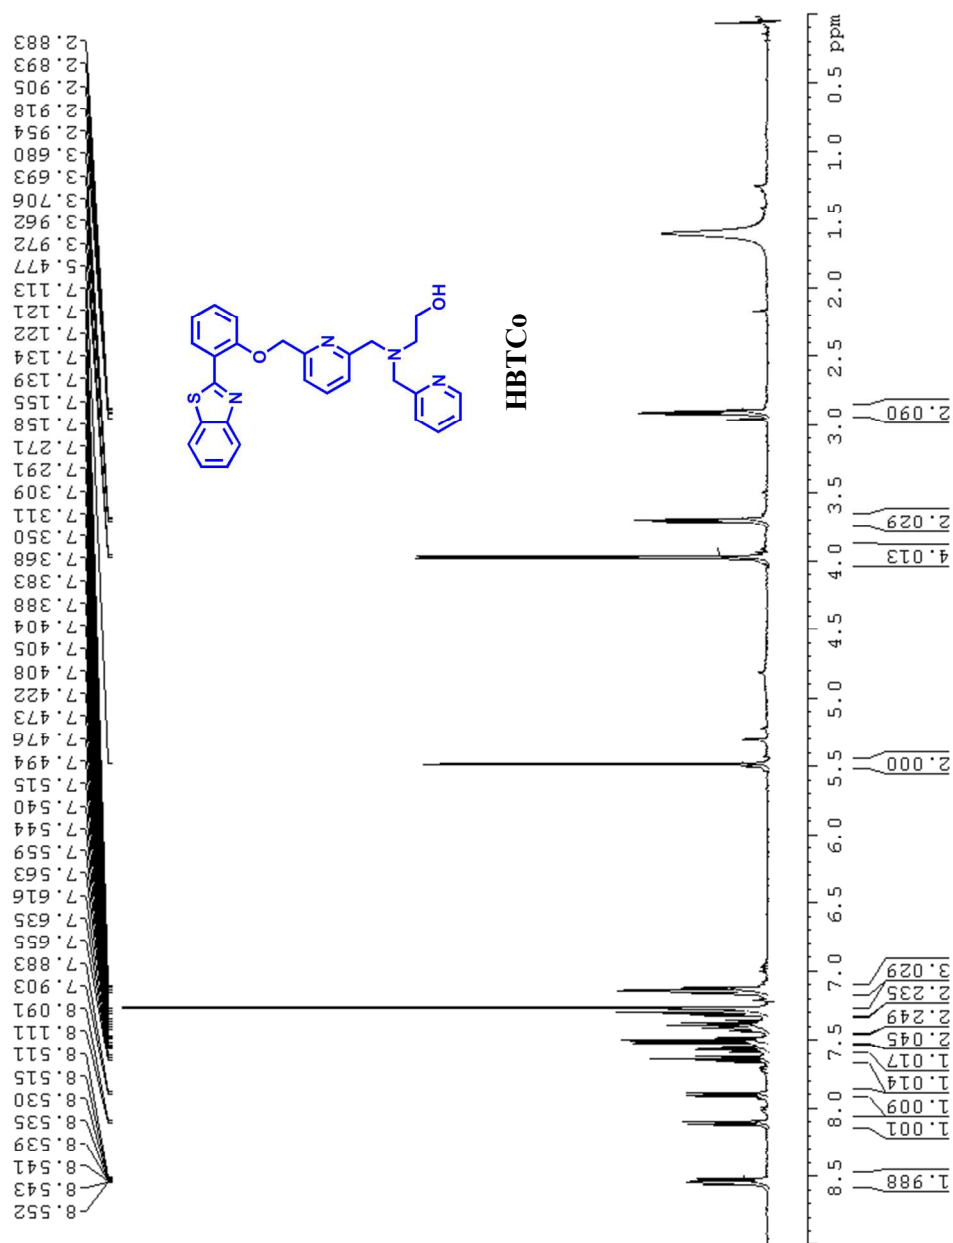

# <sup>13</sup>C NMR spectrum of HBTCO

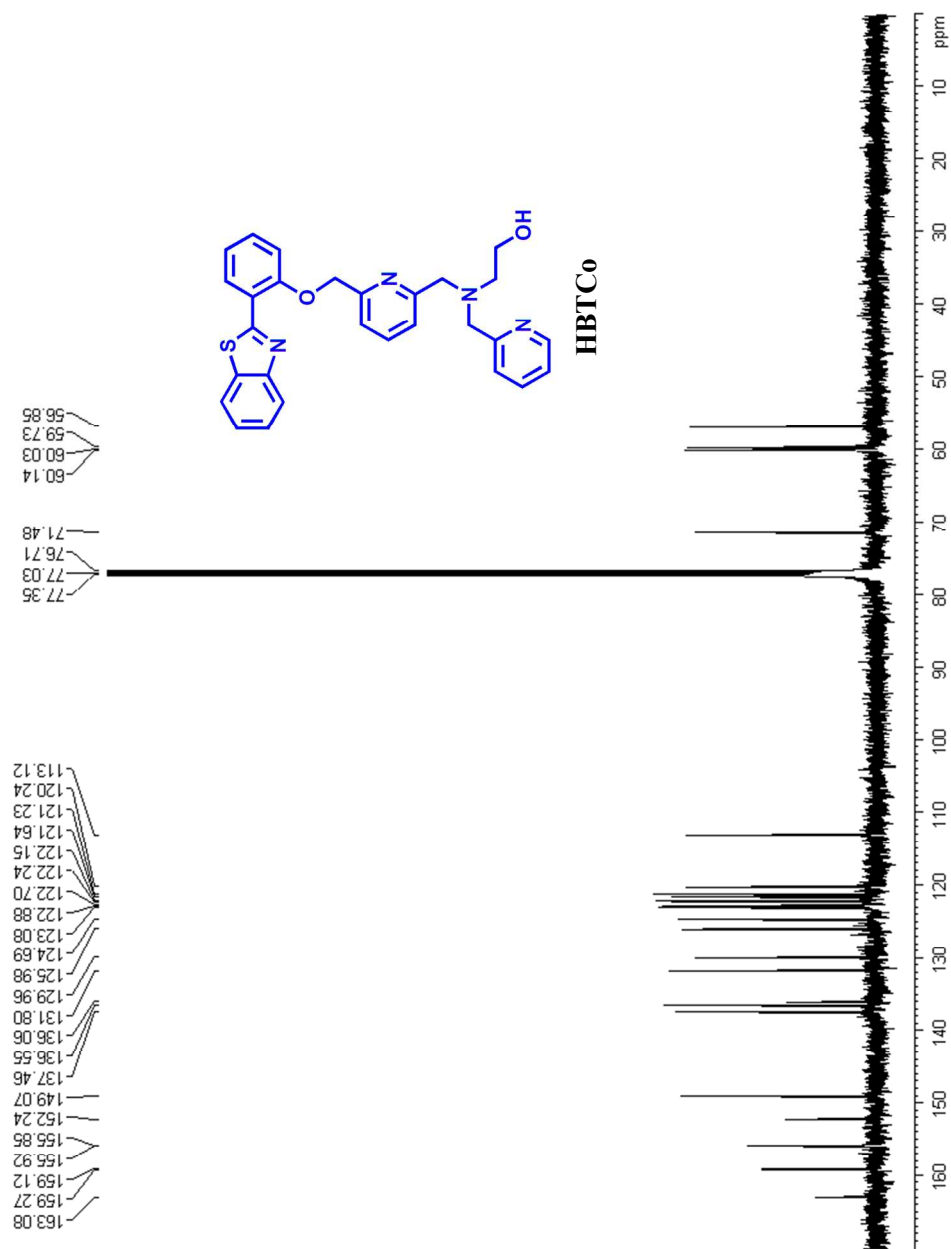

# <sup>1</sup>H NMR spectrum of HBTcCu

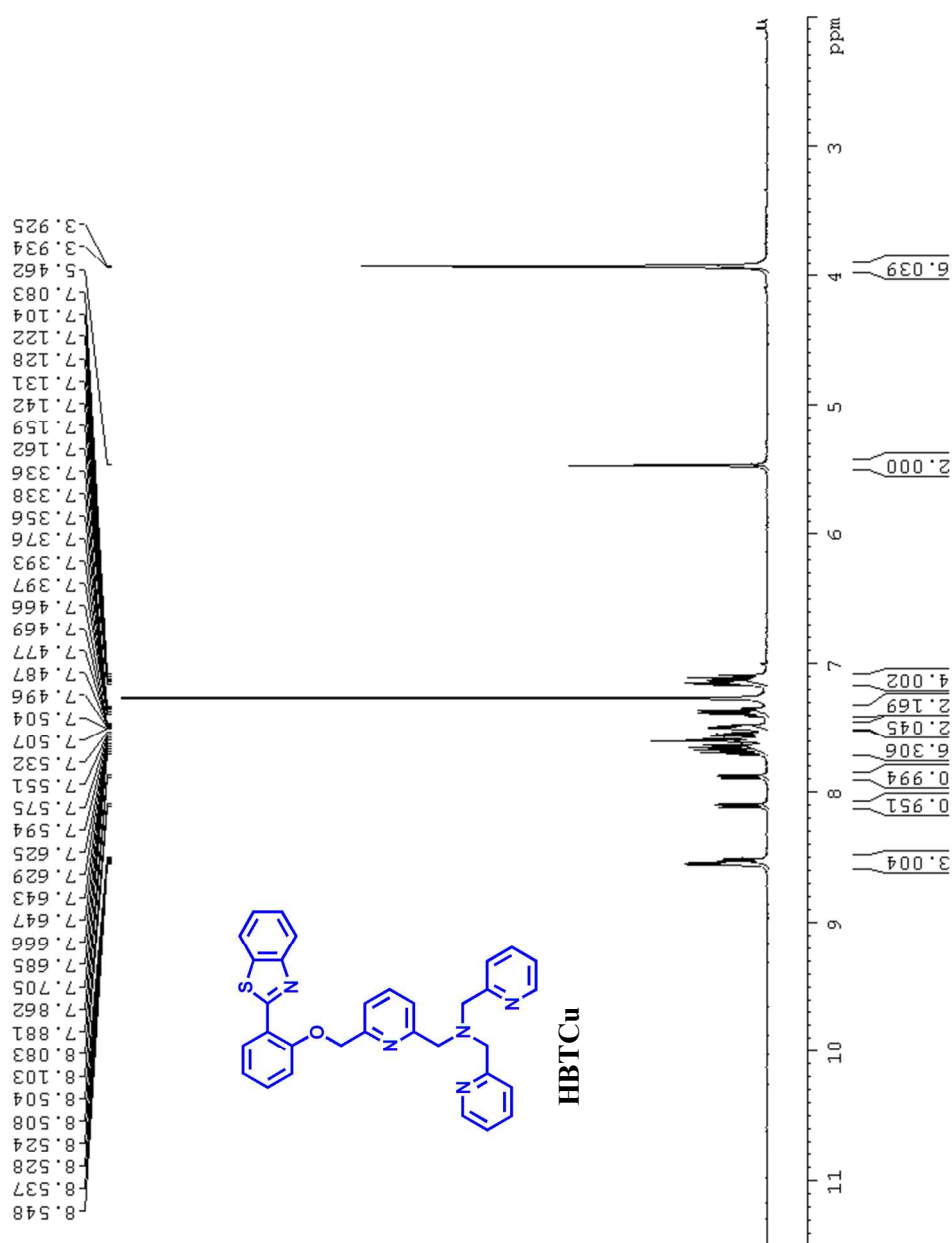

# <sup>13</sup>C NMR spectrum of HBTCu

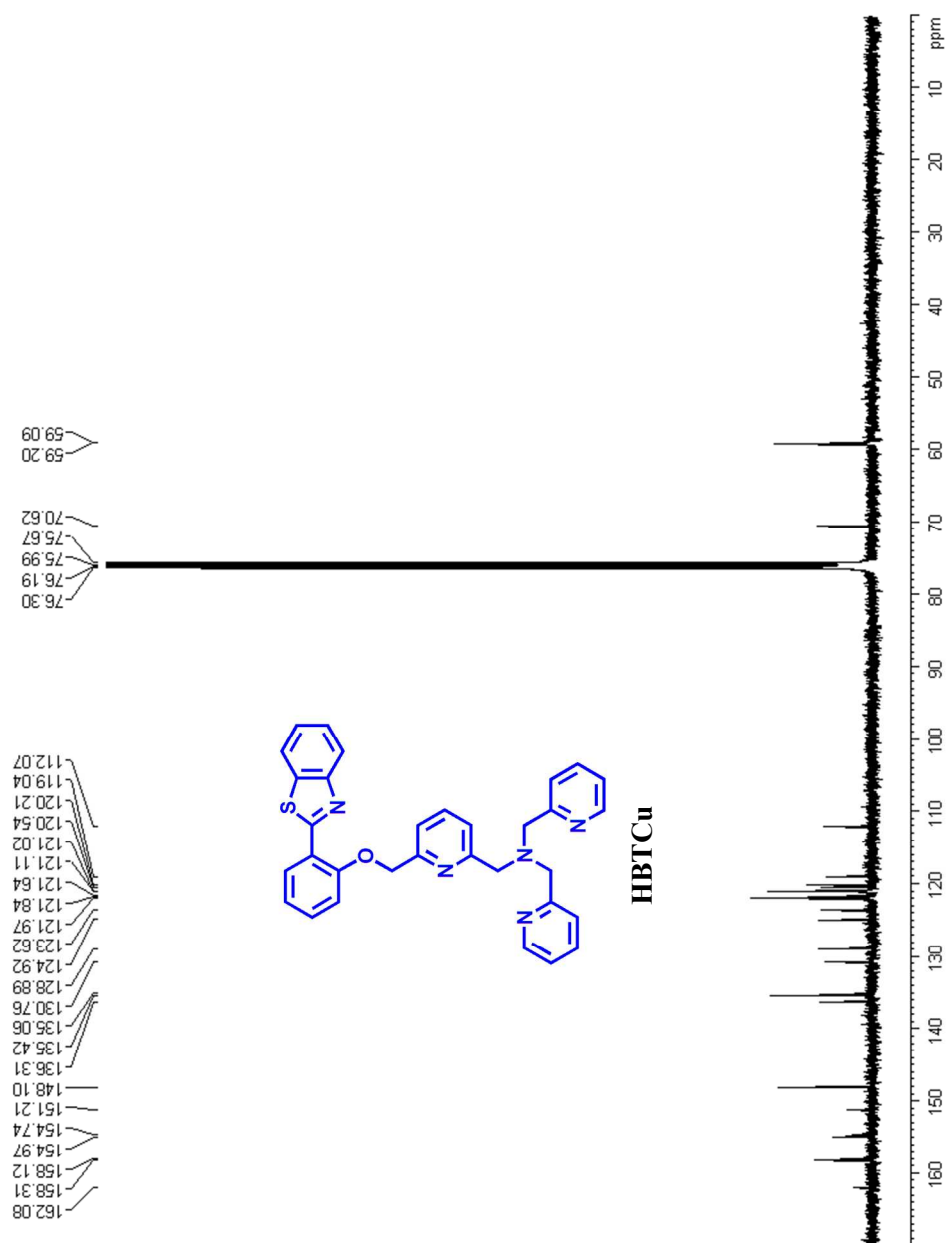

## HRMS spectra

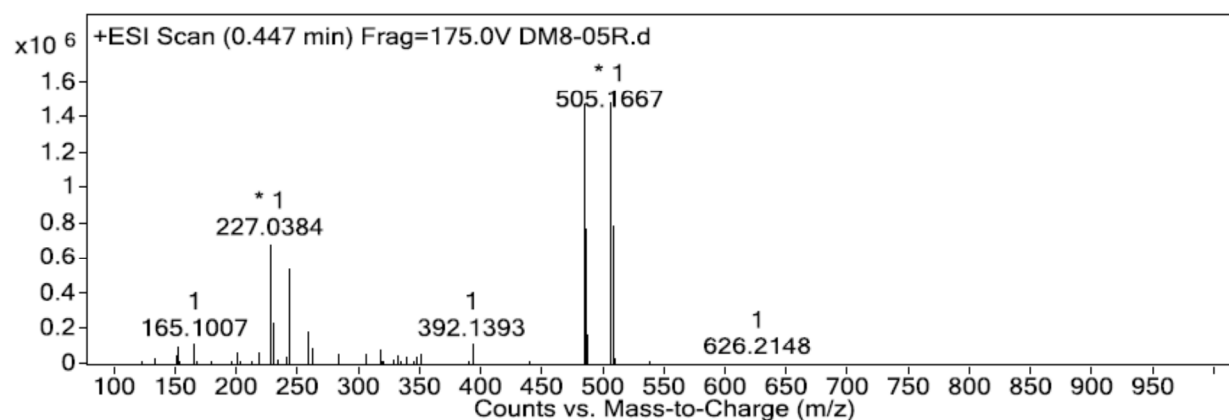

**Figure S12.** HRMS spectra of **HBTCo**. Observed  $m/z = 505.1667$   $[M + Na]^+$  and calculated  $m/z = 505.1674$  for  $C_{28}H_{26}N_4NaO_2S$ .

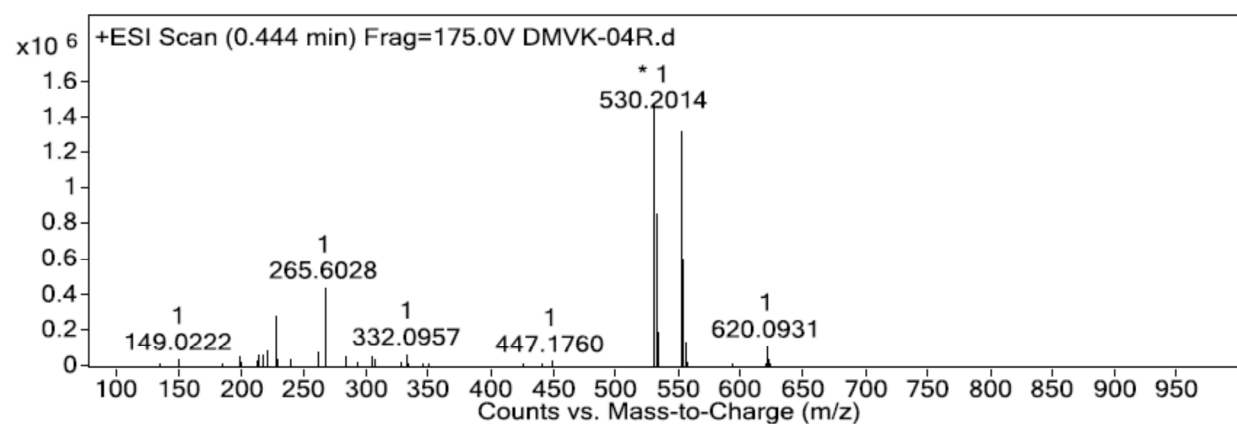

**Figure S13.** HRMS spectra of **HBTCu**. HRMS: observed  $m/z = 530.2014$   $[M + H]^+$  and calculated  $m/z = 530.2015$  for  $C_{32}H_{28}N_5OS$ .

## References

- (1) Au-Yeung H. Y.; New E. J.; Chang C. J. *Chem. Commun.* **2012**, 48, 5268.
- (2) Lucchese B.; Humphreys K. J.; Lee D.; Incarvito C. D.; Sommer R. D.; Rheingold A. L.; Karlin K. D. *Inorg. Chem.* **2004**, 43, 5987.
